# Supplementary material
Source: Springer Nature journal article supplement (https://www.springermedizin.de/resource/supplementary/12933_2010_334_MOESM3_ESM.pdf/9538176)
Supplement: MOESM3 [file 9538176]

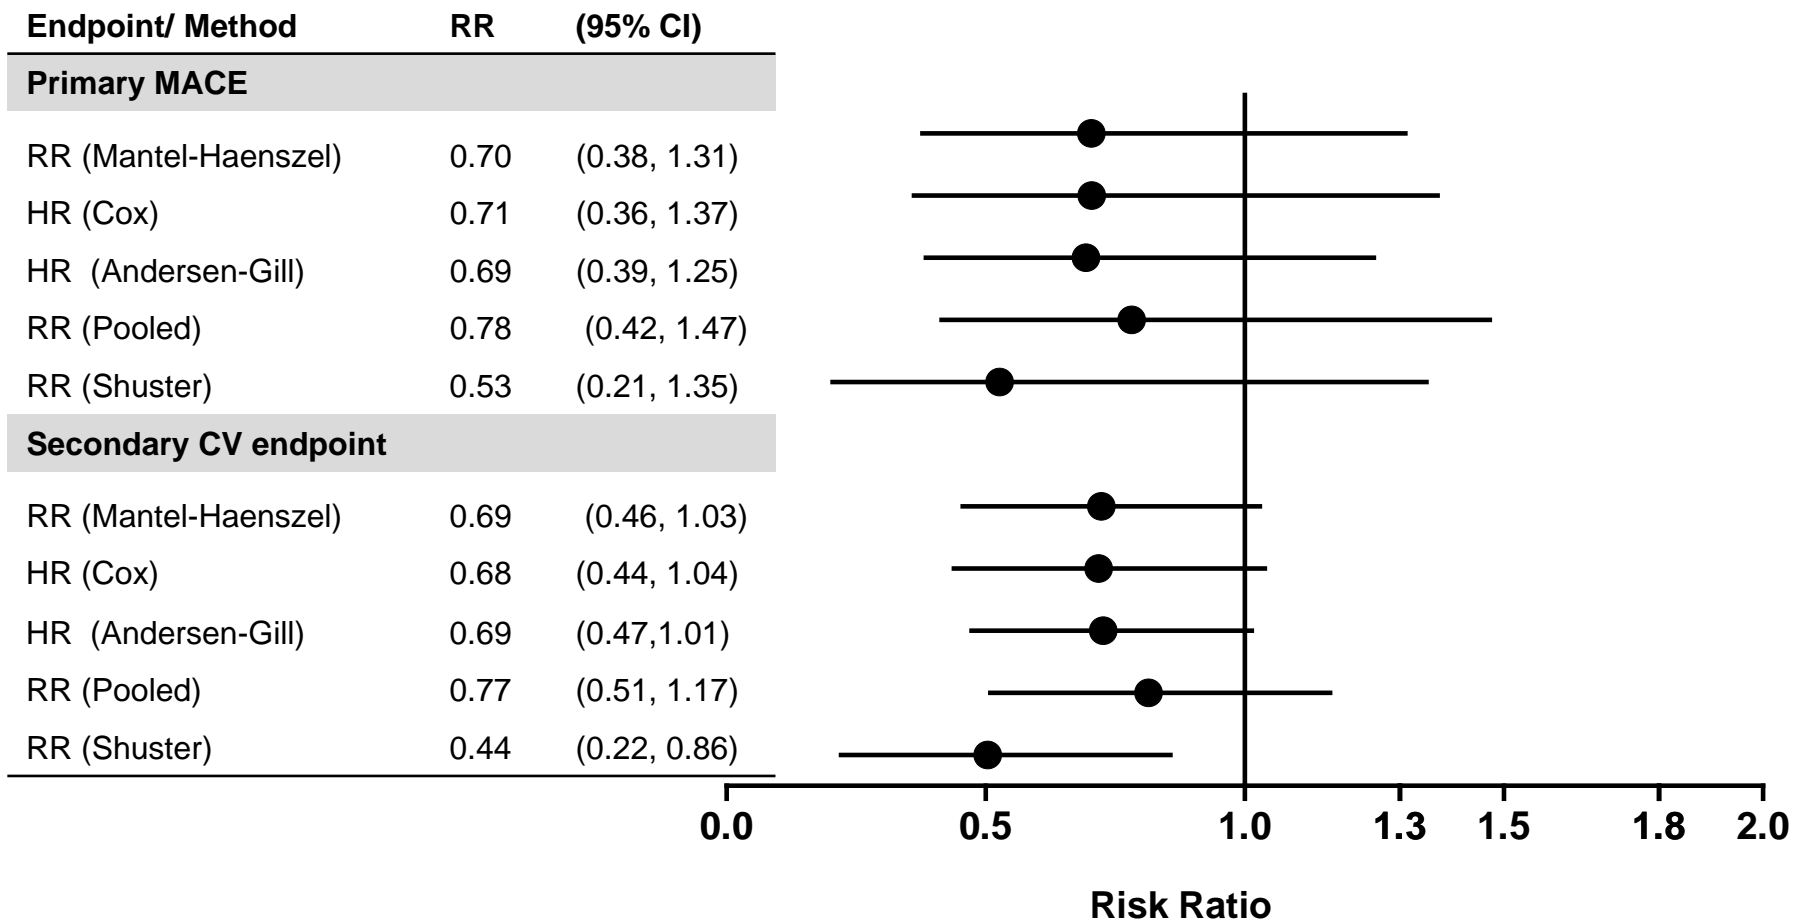

• RR exenatide BID vs. all placebo or comparator studies

Sensitivity analyses included the pooled RR without stratification by study, and Shuster's method, which weights all trials equally. Hazard ratios (HRs) and 95% CIs were obtained from the Cox proportional hazard regression model and the Andersen-Gill model, with adjustment for study.
